# Supplementary material for: Live-cell imaging of circadian clock protein dynamics in CRISPR-generated knock-in cells
Source: PubMed Central journal article supplement (PMC8213786; doi:10.1038/s41467-021-24086-9), 2021-06-18
Supplement: 41467_2021_24086_MOESM3_ESM.pdf [file 41467_2021_24086_MOESM3_ESM.pdf]

## Description of Additional Supplementary Files

**File Name:** Supplementary Movie 1

**Description:** Animated time series of a single CRY1-mClover3 knock-in cells' nucleus over the course of 3 days after synchronization (adapted from Fig. 2a).

**File Name:** Supplementary Movie 2

**Description:** Animated time series of a single CRY1-mScarlet-I knock-in cells' nucleus over the course of 3 days after synchronization (adapted from Fig. 2a).

**File Name:** Supplementary Movie 3

**Description:** Animated time series of a single PER2-mClover3 knock-in cells' nucleus over the course of 3 days after synchronization (adapted from Fig. 2c).

**File Name:** Supplementary Movie 4

**Description:** Animated time series of a single PER2-mScarlet-I knock-in cells' nucleus over the course of 3 days after synchronization (adapted from Fig. 2c).

**File Name:** Supplementary Movie 5

**Description:** Animated time series of a single CRY1- mClover3/PER2-mScarlet-I double knock-in cells' nucleus over the course of 3 days after synchronization (adapted from Fig. 3b).
